# Supplementary material
Source: MDPI journal article supplement (https://www.mdpi.com/2313-0105/8/11/237)
Supplement: s1 [file s1 › batteries-1943516-supplementary.pdf]

## Supporting Information

### Electrospun interconnected bead-like P2-Na<sub>x</sub>Co<sub>y</sub>Mn<sub>1-y</sub>O<sub>2</sub> (x=0.66 y=0.1) cathode material for stable sodium-ion storage

Anupriya K. Haridas<sup>1,3</sup>, Milan K. Sadan<sup>1,4</sup>, Joo-Hyung Kim<sup>1</sup>, Younki Lee<sup>1,\*</sup> and Jou-Hyeon Ahn<sup>1,2,\*</sup>

<sup>1</sup> Department of Materials Engineering and Convergence Technology, Gyeongsang National University, 501 Jinju-daero, Jinju 52828, Republic of Korea

<sup>2</sup> Department of Chemical Engineering, Gyeongsang National University, 501 Jinju-daero, Jinju 52828, Republic of Korea

<sup>3</sup> Department of Engineering, King's College London, London WC2R 2LS, UK

<sup>4</sup> Department of Chemical and Biological Engineering, University of Sheffield, Sheffield S1 3JD, UK

\* Corresponding author.

*E-mail address:* jhahn@gnu.ac.kr (J.H. Ahn)

ylee@gnu.ac.kr (Y. Lee)

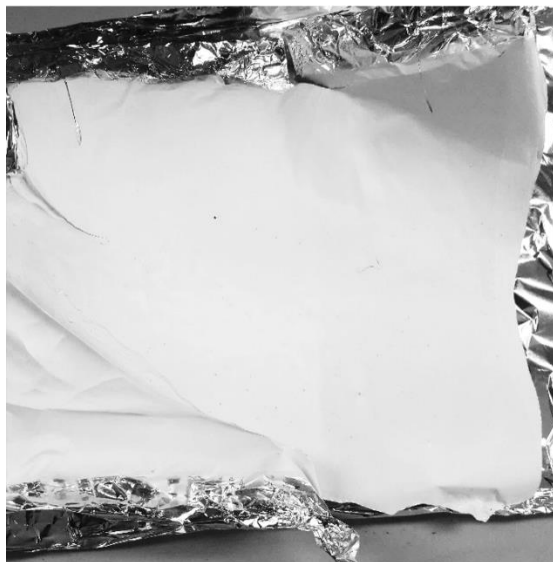

**Figure S1.** Digital photograph of electrospun NaCM-*iB* nanofiber mat.

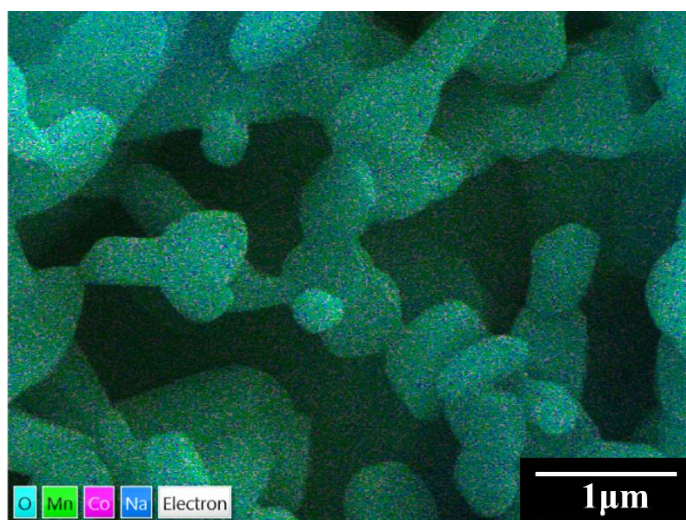

**Figure S2.** Elemental mapping image of NaCM-*iB* composite indicating the distribution of Na, Co, Mn and O elements.

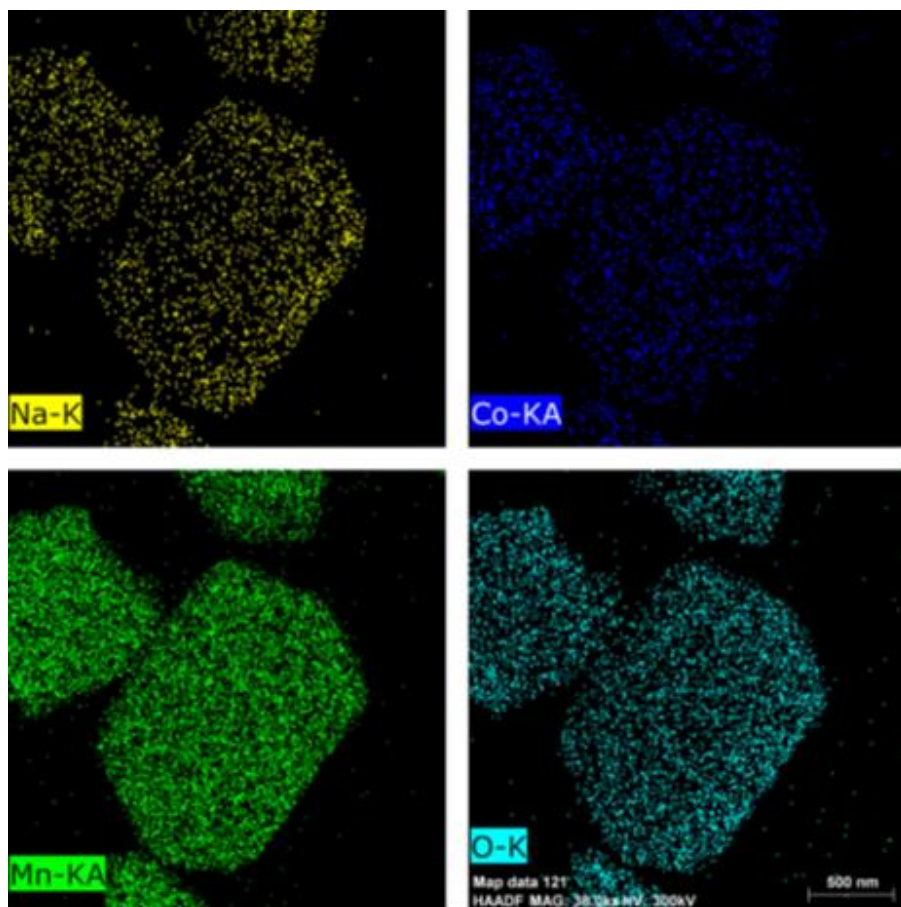

**Figure S3.** Elemental mapping image of NaCM-*f* composite indicating the distribution of Na, Co, Mn and O elements.

**Table S1.** Summary of Rietveld refinement of (a) NaCM-*iB* and (b) NaCM-*f* samples.

| Atom | Wyckoff position | X   | Y   | Z     |
|------|------------------|-----|-----|-------|
| Na1  | 2b               | 0   | 0   | 1/4   |
| Na2  | 2d               | 2/3 | 1/3 | 1/4   |
| Mn   | 2a               | 0   | 0   | 0     |
| Co   | 2a               | 0   | 0   | 0     |
| O    | 4f               | 2/3 | 1/3 | 0.913 |

(a) NaCM-*iB*: Space group= $P63/mmc$ ,  $a=b=2.8598 \text{ \AA}$ ,  $c=10.9687 \text{ \AA}$ ,  $d=3.8053$ ,  $R_{wp}=8.7$ ,  $R_p=5.3$

| Atom | Wyckoff position | X   | Y   | Z     |
|------|------------------|-----|-----|-------|
| Na1  | 2b               | 0   | 0   | 1/4   |
| Na2  | 2d               | 2/3 | 1/3 | 1/4   |
| Mn   | 2a               | 0   | 0   | 0     |
| Co   | 2a               | 0   | 0   | 0     |
| O    | 4f               | 2/3 | 1/3 | 0.912 |

(b) NaCM-*f*: Space group= $P63/mmc$ ,  $a=b=2.8513 \text{ \AA}$ ,  $c=11.1659 \text{ \AA}$ ,  $d=3.7379$ ,  $R_{wp}=13.5$ ,  $R_p=9.2$

| Composite       | Na    | Co    | Mn   |
|-----------------|-------|-------|------|
| NaCM- <i>iB</i> | 0.658 | 0.090 | 0.91 |
| NaCM- <i>f</i>  | 0.651 | 0.13  | 0.87 |

**Table S2.** Elemental distribution in NaCM-*iB* and NaCM-*f* from ICP analysis.

| Composite       | C (%) | Tap density (g cm <sup>-3</sup> ) |
|-----------------|-------|-----------------------------------|
| NaCM- <i>iB</i> | 2     | 1.46                              |
| NaCM- <i>f</i>  | 0.6   | 1.98                              |

**Table S3.** Carbon content in NaCM-*iB* and NaCM-*f* cathodes along with the respective tap densities.

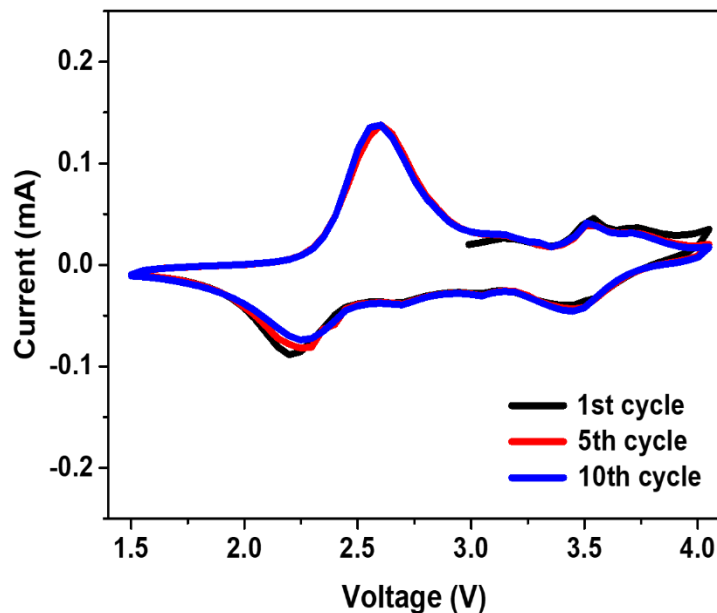

**Figure S4.** Cyclic voltammetry curves of NaCM-*iB* electrode vs. Na/Na<sup>+</sup> at 0.05 mV s<sup>-1</sup>.

#### **Preparation of carbon nanofiber (CNF) electrode**

Typically, polyvinyl pyrrolidone (PVP, average Mw =13,000,000, Sigma Aldrich) was dissolved in an ethanol/water mixture (12 wt%, 1:1 v/v) by stirring thoroughly overnight. The solution was directly electrospun with an applied voltage of 20 kV, the distance between the collector to the tip of the needle as 15 cm distance, a flow rate of 0.1 ml h<sup>-1</sup> and 26% humidity to yield nanofibers. The obtained fiber mat was peeled-off and heat-treated at 400 °C for 5 h to stabilize the fiber mat, followed by the second stage of heat-treatment at 800 °C for 6 h in a compressed air atmosphere, maintaining a slow ramp rate of 3 °C min<sup>-1</sup>. The carbonized fibers (CNF) were mixed with a binder (PVDF) and conductive agent (Super P) in an 8:1:1 ratio using NMP as the solvent. The viscous slurry was cast on an Al current collector and dried in a vacuum atmosphere at 100 °C for 10 h to eradicate the residual solvent prior to employing it as the electrode.

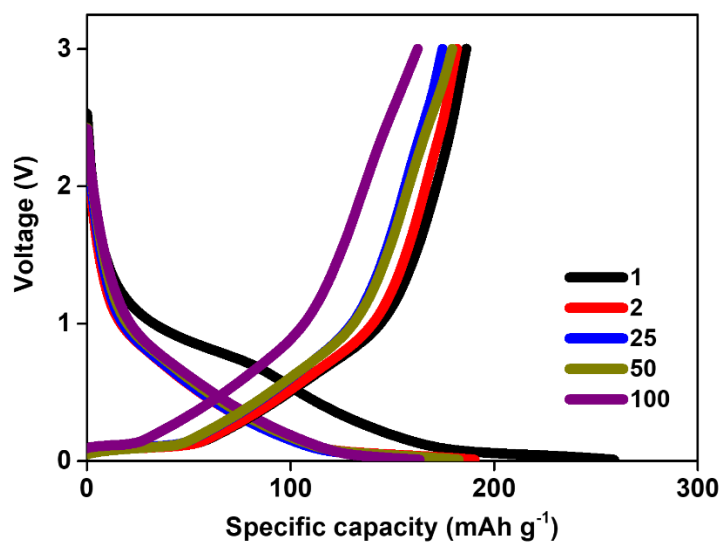

**Figure S5.** Voltage profile of CNF vs. Na/Na<sup>+</sup> cells at 50 mA g<sup>-1</sup>.

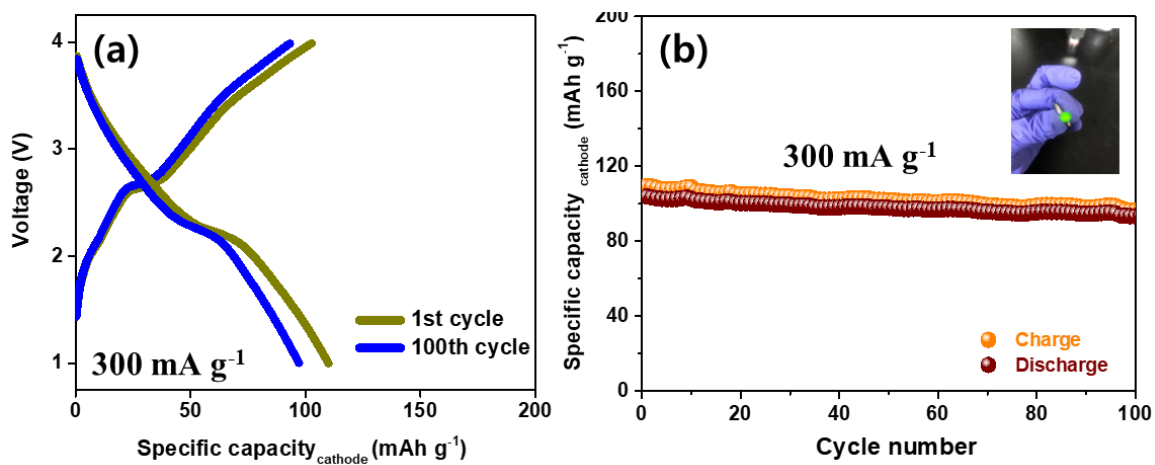

**Figure S6.** (a) Voltage profile and (b) cycle performance of NaCM-*iB*||CNF full cell at a current density of 300 mA g<sup>-1</sup>. Inset: green led lighted with NaCM-*iB*||CNF cell.
